# Supplementary material for: Development and validation of China’s Environmental Citizenship Questionnaire: evidence from junior high school students
Source: Frontiers journal article supplement (doi:10.3389/fenvs.2024.1105469), 2024-09-19
Supplement: Data_Sheet_1.pdf [file Data_Sheet_1.pdf]

# Supplementary Material

## 1. The initial 91 items

**Q1. Have you ever been involved in any of the following organizations, clubs, or groups outside school? (Please tick only one box in each row)**

|                                                                 | Yes, I have done<br>this within the<br>last 12 months | Yes, I have done<br>this but more than<br>1 year ago | No, I have never<br>done this |
|-----------------------------------------------------------------|-------------------------------------------------------|------------------------------------------------------|-------------------------------|
| a. Environmental action group or organization                   |                                                       |                                                      |                               |
| b. Human Rights organization                                    |                                                       |                                                      |                               |
| c. Voluntary group doing something to help the community        |                                                       |                                                      |                               |
| d. Organization collecting money for an environmental purpose   |                                                       |                                                      |                               |
| e. Group of young people campaigning for an environmental issue |                                                       |                                                      |                               |
| f. Animal rights or animal welfare group                        |                                                       |                                                      |                               |

*Note:* Only one item (b) was removed.

**Q2. At school, to what extent have you learned about the following topics? (Please tick only one box in each row)**

|                                                                                      | To a<br>large<br>extent | To a<br>moderate<br>extent | To a<br>small<br>extent | Not at<br>all |
|--------------------------------------------------------------------------------------|-------------------------|----------------------------|-------------------------|---------------|
| a. How to contribute to the prevention of environmental problems                     |                         |                            |                         |               |
| b. How to contribute to the solution of environmental problems                       |                         |                            |                         |               |
| c. How to develop a healthy relation with nature                                     |                         |                            |                         |               |
| d. How to contribute to the achievement of sustainability                            |                         |                            |                         |               |
| e. What are the environmental rights and duties of a citizen                         |                         |                            |                         |               |
| f. How to assess structural causes of environmental degradation and problems (roots) |                         |                            |                         |               |
| g. How to actively participate in society                                            |                         |                            |                         |               |
| h. How to promote inter- and intra-generational justice                              |                         |                            |                         |               |
| i. How to act and network at the local level (community, town, area)                 |                         |                            |                         |               |
| j. How to act and network at the national level (country)                            |                         |                            |                         |               |
| k. How to act and network at the global level                                        |                         |                            |                         |               |

*Note:* Only two items (f, h) were removed.

**Q3. How important are the following behaviors for being a good environmental citizen? (Please tick only one box in each row)**

|  | Very<br>important | Quite<br>important | Not very<br>important | Not<br>important at<br>all |
|--|-------------------|--------------------|-----------------------|----------------------------|
|  |                   |                    |                       |                            |

|                                                                                                                                                                                                                                                                                                                                                                                                                                                                                                                                                                                                                                                                                                                                                                                 |  |
|---------------------------------------------------------------------------------------------------------------------------------------------------------------------------------------------------------------------------------------------------------------------------------------------------------------------------------------------------------------------------------------------------------------------------------------------------------------------------------------------------------------------------------------------------------------------------------------------------------------------------------------------------------------------------------------------------------------------------------------------------------------------------------|--|
| a. Voting in every national election<br>b. Joining a political party<br>c. Following environmental issues in the newspaper, on the radio, on TV, or on the Internet<br>d. Showing respect for government representatives<br>e. Engaging in environmental discussions<br>f. Making personal efforts to protect natural resources (e.g., through saving water or recycling waste)<br>g. Respecting the rights of others to have their own opinions<br>h. Supporting people who are worse off than you<br>i. Engaging in activities to help people in less developed countries<br>j. Participating in peaceful protests against laws believed to be unjust<br>k. Taking part in activities promoting environmental rights<br>l. Participating in activities to benefit environment |  |
|---------------------------------------------------------------------------------------------------------------------------------------------------------------------------------------------------------------------------------------------------------------------------------------------------------------------------------------------------------------------------------------------------------------------------------------------------------------------------------------------------------------------------------------------------------------------------------------------------------------------------------------------------------------------------------------------------------------------------------------------------------------------------------|--|

*Note:* Only three items (h, i, j) were removed.

**Q4. How well do you think you would do the following activities as a student? (Please tick only one box in each row)**

|                                                                                                                                                                                                                                                                                                                                                                                                                                                                  | Very well | Fairly well | Not very well | Not at all |
|------------------------------------------------------------------------------------------------------------------------------------------------------------------------------------------------------------------------------------------------------------------------------------------------------------------------------------------------------------------------------------------------------------------------------------------------------------------|-----------|-------------|---------------|------------|
| a. Discuss a newspaper article about an environmental conflict<br>b. Argue your point of view about a controversial environmental issue<br>c. Organize a group of students in order to achieve environmental changes at school<br>d. Follow a TV debate about a controversial environmental issue<br>e. Write a letter or email to a newspaper giving your view on a current environmental issue<br>f. Speak in front of your class about an environmental issue |           |             |               |            |

*Note:* No item was removed or added.

**Q5. The following statements are related to our relationship with sustainability. There are no right or wrong answers. (Please tick only one box in each row)**

|                                                                                                                                                                                                                                                                                                                                                                                                                                                                                                                                                                                                                                                                          | Very much agree | Agree | Disagree | Very much disagree |
|--------------------------------------------------------------------------------------------------------------------------------------------------------------------------------------------------------------------------------------------------------------------------------------------------------------------------------------------------------------------------------------------------------------------------------------------------------------------------------------------------------------------------------------------------------------------------------------------------------------------------------------------------------------------------|-----------------|-------|----------|--------------------|
| a. I think that using more natural resources than we need does not threaten the health and well-being of people in the future<br>b. I think that we need stricter laws and regulations to protect the environment<br>c. I think that it is important to take measures against problems related to climate change<br>d. I think that everyone ought to be given the opportunity to acquire the knowledge, values, and skills necessary to live sustainably<br>e. I think that we who are living now should make sure that people in the future enjoy the same quality of life as we do today<br>f. I think that women and men throughout the world must be given the same |                 |       |          |                    |

|                                                                                                                            |  |
|----------------------------------------------------------------------------------------------------------------------------|--|
| opportunities for education and employment                                                                                 |  |
| g. I think that companies have a responsibility to reduce the use of packaging and disposable articles                     |  |
| h. I think it is important to reduce poverty                                                                               |  |
| i. I think that companies in rich countries should give employees in poor nations the same conditions as in rich countries |  |
| <i>Note:</i> Only two items (a, h) were removed.                                                                           |  |

**Q6. How important do you find the following statements? (Please tick only one box in each row)**

|                                                                    | Most<br>important | Important | Little<br>important | Not<br>important |
|--------------------------------------------------------------------|-------------------|-----------|---------------------|------------------|
| a. It is important to me to prevent environmental pollution        |                   |           |                     |                  |
| b. It is important to me to protect the environment                |                   |           |                     |                  |
| c. It is important to me to respect nature                         |                   |           |                     |                  |
| d. It is important to me to be in unity with nature                |                   |           |                     |                  |
| e. It is important to me that every person has equal opportunities |                   |           |                     |                  |
| f. It is important to me to take care of those who are worse off   |                   |           |                     |                  |
| g. It is important to me that every person is treated justly       |                   |           |                     |                  |
| h. It is important to me that there is no war or conflict          |                   |           |                     |                  |
| i. It is important to me to be helpful to others                   |                   |           |                     |                  |
| j. It is important to me to have fun                               |                   |           |                     |                  |
| k. It is important to me to enjoy life's pleasures                 |                   |           |                     |                  |
| l. It is important to me to do things that I enjoy                 |                   |           |                     |                  |
| m. It is important to me to have control over others' actions      |                   |           |                     |                  |
| n. It is important to me to have authority over others             |                   |           |                     |                  |
| o. It is important to me to be influential                         |                   |           |                     |                  |
| p. It is important to me to have many possessions                  |                   |           |                     |                  |
| q. It is important to me to work hard and be ambitious             |                   |           |                     |                  |

*Note:* Only four items (f, h, j, l) were removed.

**Q7. Listed below are different activities that might be offered at your school. If you were given the chance, how likely would you be to participate in each activity as a student inside your school? (Please tick only one box in each row)**

|                                                                                                       | Very likely | Quite likely | Not very<br>likely | Not at all<br>likely |
|-------------------------------------------------------------------------------------------------------|-------------|--------------|--------------------|----------------------|
| a. Join a group of students campaigning for an environmental issue you agree with                     |             |              |                    |                      |
| b. Take part in environmental discussions in a "student assembly"                                     |             |              |                    |                      |
| c. Participate in writing articles for a school newspaper or website regarding an environmental issue |             |              |                    |                      |
| d. Organize a group of students in order to achieve environmental changes at school                   |             |              |                    |                      |

*Note:* No item was removed or added.

**Q8. There are many different ways that environmental citizens may express their opinions about important issues in**

**society. Would you take part in any of the following activities to express your opinion in the future as a student outside school? (Please tick only one box in each row)**

|                                                                                                                                                                                                                                                                                                                                                                                                                                                                                                                                                                                                                                                            | I would<br>certainly do<br>this | I would<br>probably do<br>this | I would<br>probably<br>not do this | I would<br>certainly<br>not do this |
|------------------------------------------------------------------------------------------------------------------------------------------------------------------------------------------------------------------------------------------------------------------------------------------------------------------------------------------------------------------------------------------------------------------------------------------------------------------------------------------------------------------------------------------------------------------------------------------------------------------------------------------------------------|---------------------------------|--------------------------------|------------------------------------|-------------------------------------|
| a. Talk to others about your views on environmental issues<br>b. Contact an elected representative<br>c. Take part in a peaceful march or rally<br>d. Collect signatures for a petition<br>e. Contribute to an online discussion forum about environmental issues<br>f. Organize an online group to take a stance on a controversial environmental issue<br>g. Participate in an online campaign<br>h. Choose to buy certain products in support of social justice (e.g., Fairtrade or ethically sourced products)<br>i. Spray-paint protest slogans on walls<br>j. Stage a protest by blocking traffic<br>k. Occupy public buildings as a sign of protest |                                 |                                |                                    |                                     |

*Note:* Only two items (i, j) were removed.

**Q9. To what degree would you do the following in the future? (Please tick only one box in each row)**

|                                                                                                                                                                                                                                                                                   | I would<br>certainly do<br>this | I would<br>probably do<br>this | I would<br>probably<br>not do this | I would<br>certainly<br>not do this |
|-----------------------------------------------------------------------------------------------------------------------------------------------------------------------------------------------------------------------------------------------------------------------------------|---------------------------------|--------------------------------|------------------------------------|-------------------------------------|
| a. I would try to change society and promote sustainability<br>b. I would educate peers to act in an eco-friendly way<br>c. I would actively participate in decision-making and also engage in action-taking<br>d. I would educate adults not peers to act in an eco-friendly way |                                 |                                |                                    |                                     |

*Note:* No item was removed or added.

**Q10. There are many different ways for environmental citizens to express their opinions about important issues in society. Would you take part in any of the following activities to express your opinion as a future citizen? (Please tick only one box in each row)**

|                                                                                                                                                                                                                                                                                                                                                          | I would<br>certainly do<br>this | I would<br>probably do<br>this | I would<br>probably<br>not do this | I would<br>certainly<br>not do this |
|----------------------------------------------------------------------------------------------------------------------------------------------------------------------------------------------------------------------------------------------------------------------------------------------------------------------------------------------------------|---------------------------------|--------------------------------|------------------------------------|-------------------------------------|
| a. Talk to others about your views on environmental issues<br>b. Contact an elected representative<br>c. Take part in a peaceful march or rally<br>d. Collect signatures for a petition<br>e. Contribute to an online discussion forum about environmental issues<br>f. Organize an online group to take a stance on a controversial environmental issue |                                 |                                |                                    |                                     |

- g. Participate in an online campaign
- h. Choose to buy certain products in support of social justice (e.g., Fairtrade or ethically sourced products)
- i. Spray-paint protest slogans on walls
- j. Stage a protest by blocking traffic
- k. Occupy public buildings as a sign of protest

---

*Note:* Only two items (i, j) were removed

## 2. The factor loadings of items

| Items                                                                                                          | Factor Loadings |
|----------------------------------------------------------------------------------------------------------------|-----------------|
| <b>F1. Have you ever been involved in any of the following organizations, clubs, or groups outside school?</b> |                 |
| 1a. Environmental action group or organization                                                                 | 0.445           |
| 1c. Voluntary group doing something to help the community                                                      | 0.503           |
| 1d. Organization collecting money for an environmental purpose                                                 | 0.583           |
| 1e. Group of young people campaigning for an environmental issue                                               | 0.615           |
| 1f. Animal rights or animal welfare group                                                                      | 0.595           |
|                                                                                                                |                 |
| <b>F2. At school, to what extent have you learned about the following topics?</b>                              |                 |
| 2a. How to contribute to the prevention of environmental problems                                              | 0.706           |
| 2b. How to contribute to the solution of environmental problems                                                | 0.667           |
| 2c. How to develop a healthy relation with nature                                                              | 0.614           |
| 2d. How to contribute to the achievement of sustainability                                                     | 0.578           |
| 2e. What are the environmental rights and duties of a citizen                                                  | 0.473           |
| 2g. How to actively participate in society                                                                     | 0.415           |
| 2i. How to act and network at the local level (community, town, area)                                          | 0.690           |
| 2j. How to act and network at the national level (country)                                                     | 0.835           |
| 2k. How to act and network at the global level                                                                 | 0.828           |
|                                                                                                                |                 |
| <b>F3. How important are the following behaviors for being a good environmental citizen?</b>                   |                 |
| 3a. Voting in every national election                                                                          | 0.413           |
| 3b. Joining a political party                                                                                  | 0.486           |
| 3c. Following environmental issues in the newspaper, on the radio, on TV, or on the Internet                   | 0.584           |
| 3d. Showing respect for government representatives                                                             | 0.618           |
| 3e. Engaging in environmental discussions                                                                      | 0.514           |
| 3f. Making personal efforts to protect natural resources (e.g., through saving water or recycling waste)       | 0.647           |
| 3g. Respecting the rights of others to have their own opinions                                                 | 0.499           |
| 3k. Taking part in activities promoting environmental rights                                                   | 0.561           |
| 3l. Participating in activities to benefit environment                                                         | 0.557           |
|                                                                                                                |                 |
| <b>F4. How well do you think you would do the following activities as a student?</b>                           |                 |
| 4a. Discuss a newspaper article about an environmental conflict                                                | 0.573           |
| 4b. Argue your point of view about a controversial environmental issue                                         | 0.530           |
| 4c. Organize a group of students in order to achieve environmental changes at school                           | 0.620           |
| 4d. Follow a TV debate about a controversial environmental issue                                               | 0.631           |

|                                                                                                                                        |       |
|----------------------------------------------------------------------------------------------------------------------------------------|-------|
| 4e. Write a letter or email to a newspaper giving your view on a current environmental issue                                           | 0.624 |
| 4f. Speak in front of your class about an environmental issue                                                                          | 0.481 |
|                                                                                                                                        |       |
| <b>F5. The following statements are related to our relationship with sustainability.</b>                                               |       |
| 5b. I think that we need stricter laws and regulations to protect the environment                                                      | 0.392 |
| 5c. I think that it is important to take measures against problems related to climate change                                           | 0.565 |
| 5d. I think that everyone ought to be given the opportunity to acquire the knowledge, values, and skills necessary to live sustainably | 0.576 |
| 5e. I think that we who are living now should make sure that people in the future enjoy the same quality of life as we do today        | 0.497 |
| 5f. I think that women and men throughout the world must be given the same opportunities for education and employment                  | 0.505 |
| 5g. I think that companies have a responsibility to reduce the use of packaging and disposable articles                                | 0.515 |
| 5i. I think that companies in rich countries should give employees in poor nations the same conditions as in rich countries            | 0.422 |
|                                                                                                                                        |       |
| <b>F6. How important do you find the following statements?</b>                                                                         |       |
| 6a. It is important to me to prevent environmental pollution                                                                           | 0.673 |
| 6b. It is important to me to protect the environment                                                                                   | 0.748 |
| 6c. It is important to me to respect nature                                                                                            | 0.756 |
| 6d. It is important to me to be in unity with nature                                                                                   | 0.738 |
| 6e. It is important to me that every person has equal opportunities                                                                    | 0.649 |
| 6g. It is important to me that every person is treated justly                                                                          | 0.561 |
| 6i. It is important to me to be helpful to others                                                                                      | 0.513 |
| 6k. It is important to me to enjoy life's pleasures                                                                                    | 0.481 |
| 6m. It is important to me to have control over others' actions                                                                         | 0.601 |
| 6n. It is important to me to have authority over others                                                                                | 0.723 |
| 6o. It is important to me to be influential                                                                                            | 0.610 |
| 6p. It is important to me to have many possessions                                                                                     | 0.546 |
| 6q. It is important to me to work hard and be ambitious                                                                                | 0.532 |
|                                                                                                                                        |       |
| <b>F7. If you were given the chance, how likely would you be to participate in each activity as a student inside your school?</b>      |       |
| 7a. Join a group of students campaigning for an environmental issue you agree with                                                     | 0.678 |
| 7b. Take part in environmental discussions in a "student assembly"                                                                     | 0.742 |
| 7c. Participate in writing articles for a school newspaper or website regarding an environmental issue                                 | 0.662 |
| 7d. Organize a group of students in order to achieve environmental changes at                                                          | 0.740 |

|                                                                                                                                      |       |
|--------------------------------------------------------------------------------------------------------------------------------------|-------|
| school                                                                                                                               |       |
|                                                                                                                                      |       |
| <b>F8. Would you take part in any of the following activities to express your opinion in the future as a student outside school?</b> |       |
| 8a. Talk to others about your views on environmental issues                                                                          | 0.520 |
| 8b. Contact an elected representative                                                                                                | 0.643 |
| 8c. Take part in a peaceful march or rally                                                                                           | 0.613 |
| 8d. Collect signatures for a petition                                                                                                | 0.717 |
| 8e. Contribute to an online discussion forum about environmental issues                                                              | 0.696 |
| 8f. Organize an online group to take a stance on a controversial environmental issue                                                 | 0.701 |
| 8g. Participate in an online campaign                                                                                                | 0.616 |
| 8h. Choose to buy certain products in support of social justice (e.g., fair trade or ethically sourced products)                     | 0.457 |
| 8k. Occupy public buildings as a sign of protest                                                                                     | 0.464 |
|                                                                                                                                      |       |
| <b>F9. To what degree would you do the following in the future?</b>                                                                  |       |
| 9a. I would try to change society and promote sustainability                                                                         | 0.707 |
| 9b. I would educate peers to act in an eco-friendly way                                                                              | 0.756 |
| 9c. I would actively participate in decision-making and also engage in action-taking                                                 | 0.711 |
| 9d. I would educate other adults to act in an eco-friendly way                                                                       | 0.692 |
|                                                                                                                                      |       |
| <b>F10. Would you take part in any of the following activities to express your opinion as a future citizen?</b>                      |       |
| 10a. Talk to others about your views on environmental issues                                                                         | 0.507 |
| 10b. Contact an elected representative                                                                                               | 0.643 |
| 10c. Take part in a peaceful march or rally                                                                                          | 0.656 |
| 10d. Collect signatures for a petition                                                                                               | 0.766 |
| 10e. Contribute to an online discussion forum about environmental issues                                                             | 0.751 |
| 10f. Organize an online group to take a stance on a controversial environmental issue                                                | 0.750 |
| 10g. Participate in an online campaign                                                                                               | 0.642 |
| 10h. Choose to buy certain products in support of social justice (e.g., fair trade or ethically sourced products)                    | 0.463 |
| 10k. Occupy public buildings as a sign of protest                                                                                    | 0.455 |
